# Supplementary material for: Technical Note: A software framework for calculating compositionally dependent in situ 14 C production rates
Source: Copernicus journal article supplement (doi:10.5194/gchron-2022-16), 2022-06-15
Supplement: Supplementary file [file gchron-2022-16-AC2-supplement.pdf]

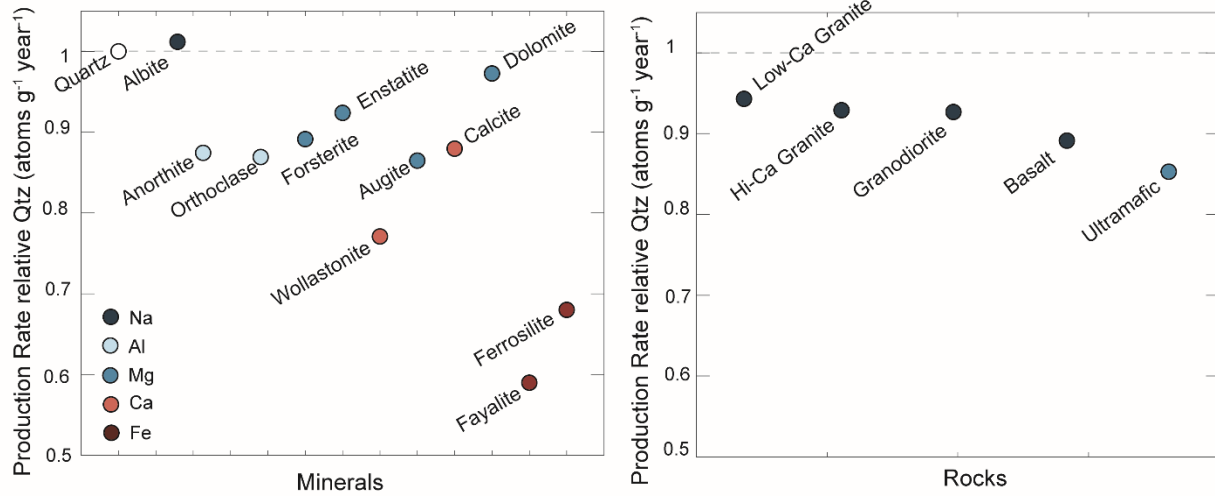

**Figure 3:** SLHL production of minerals (left) and rocks (right) compared to quartz (dashed grey line). The minerals and rocks are colored for what element contributes the highest proportion of production after oxygen and silica.
